# Supplementary material for: Catalytic CO2esterification with ethanol for the production of diethyl carbonate using optimized CeO2as catalyst
Source: Royal Society of Chemistry journal article supplement (doi:10.1039/d0cy01793k), 2021-01-01

## Supporting Information

### Catalytic CO<sub>2</sub> esterification with ethanol for the production of diethyl carbonate using optimized CeO<sub>2</sub> as catalyst

Marco Buchmann<sup>a</sup>, Martin Lucas<sup>a</sup> and Marcus Rose<sup>a</sup>

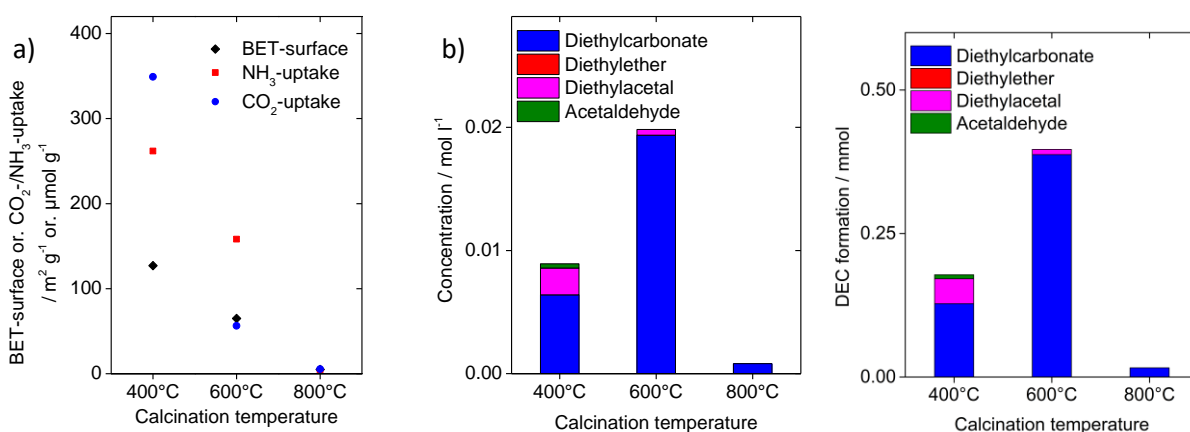

Fig. S1 Comparing the impact of various calcination temperatures of urea precipitated CeO<sub>2</sub> on the a) BET-surface and CO<sub>2</sub>-/NH<sub>3</sub>-uptake and b) reactivity towards DEC formation (Reaction conditions: 337 mmol ethanol, 0.2g catalyst, 40 bar CO<sub>2</sub>, 120°C).

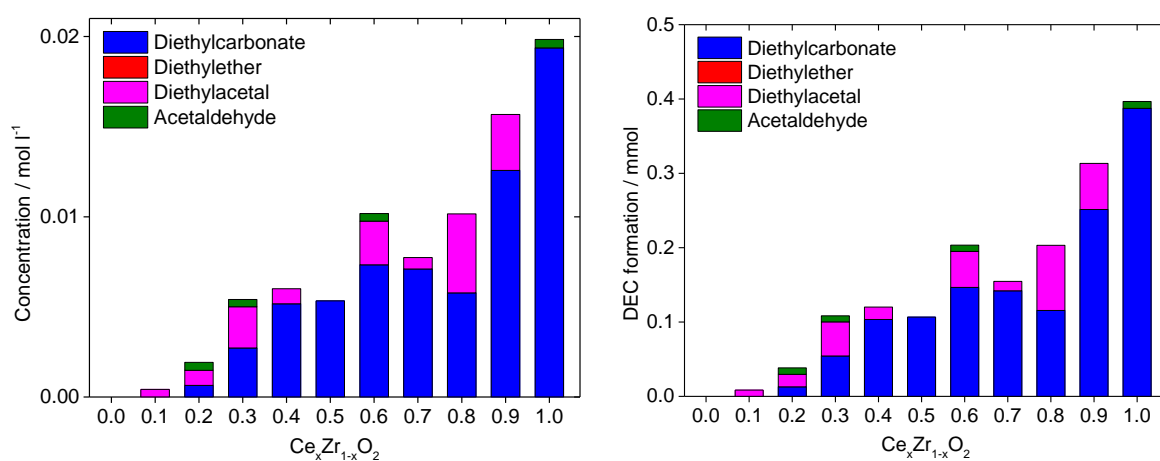

Fig. S2 Comparison of the influence of different Ce:Zr ratios on the catalytic activity towards DEC formation. Reaction conditions: 337 mmol ethanol, 0.2g catalyst, 40 bar CO<sub>2</sub>, 4h reaction time, 120°C.

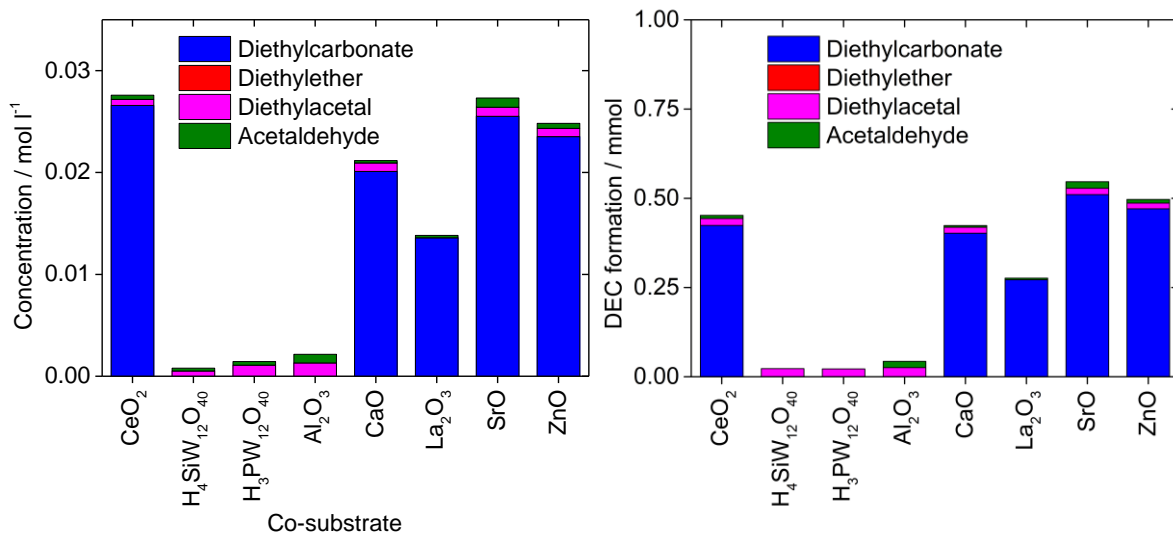

Fig. S3 Influence of various additives ( $\text{H}_4\text{SiW}_{12}\text{O}_{40}$  and  $\text{H}_3\text{PW}_{12}\text{O}_{40}$ ) and mixed oxides ( $\text{Al}_2\text{O}_3$ ,  $\text{CaO}$ ,  $\text{La}_2\text{O}_3$ ,  $\text{SrO}$  and  $\text{ZnO}$ ) on the reactivity towards DEC formation (Reaction conditions: 337 mmol ethanol, 0.2g catalyst, 4h reaction time, 120°C).

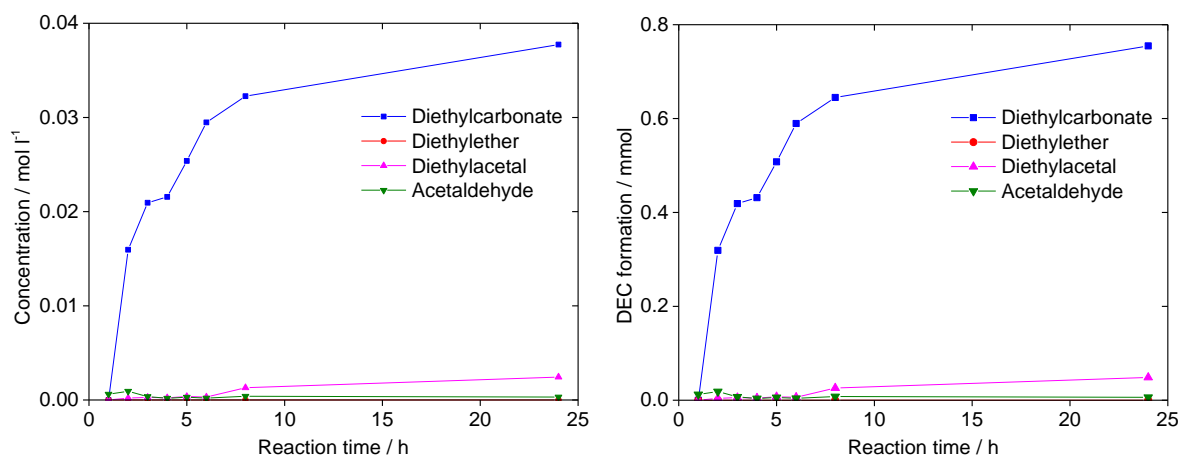

Fig. S4 Influence of reaction time on the DEC formation. Reaction conditions: 337 mmol ethanol, 0.2g catalyst, 40 bar  $\text{CO}_2$ , 120°C.

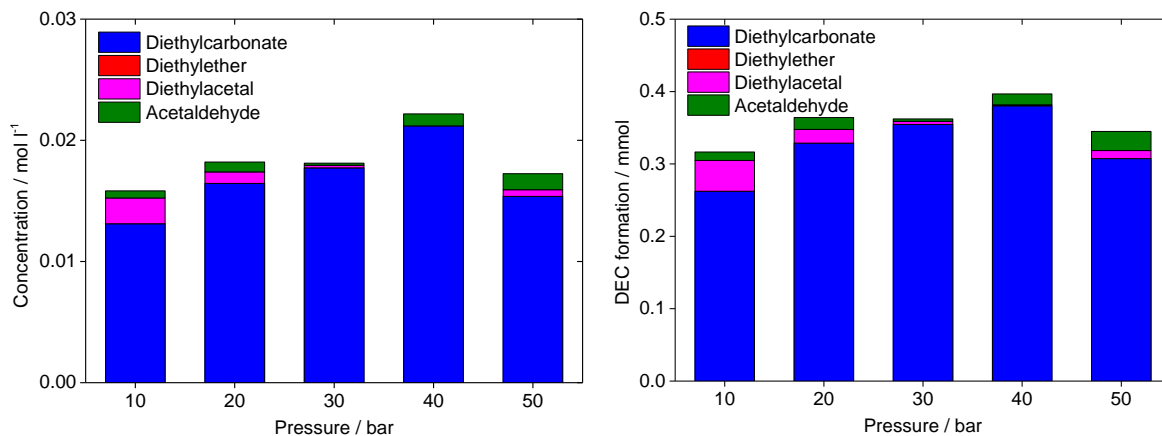

Fig. S5 Influence of the initial CO<sub>2</sub> pressure on the reactivity towards DEC formation (Reaction conditions: 337 mmol ethanol, 0.2g catalyst, 4h reaction time, 120°C).

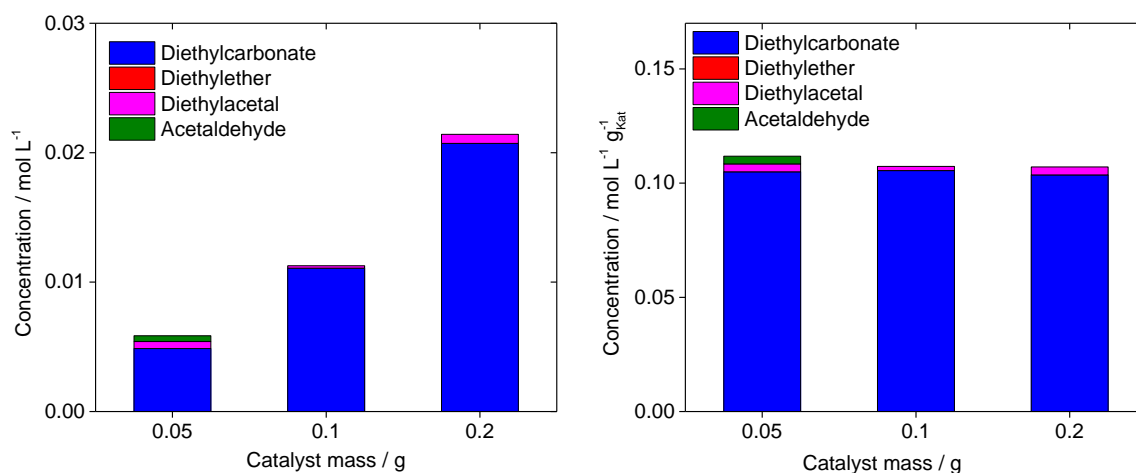

Fig. S6 Influence of the catalyst mass on the reactivity towards DEC formation (Reaction conditions: 337 mmol ethanol, 4h reaction time, 120°C). The right graph shows the same data with the concentration normalized by the catalyst mass.

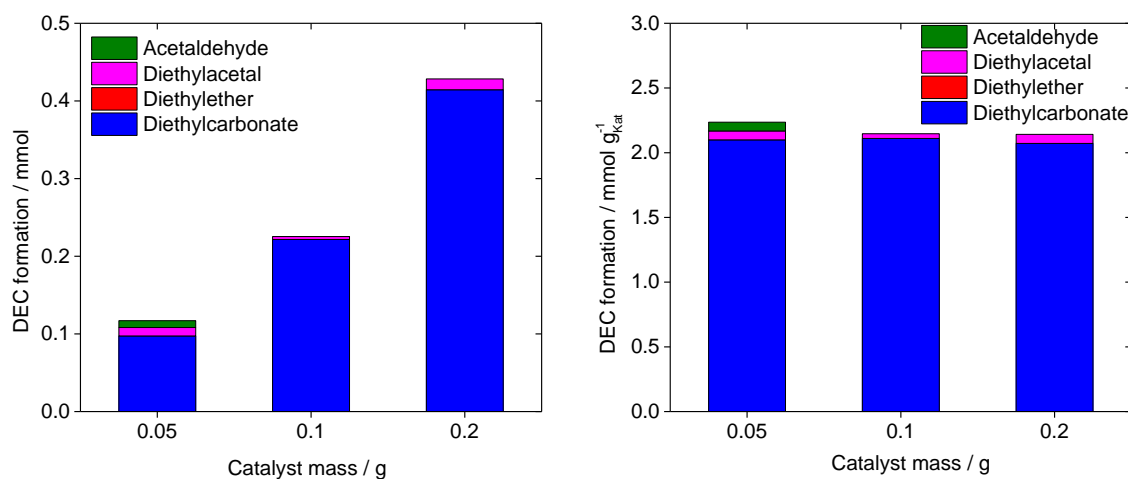

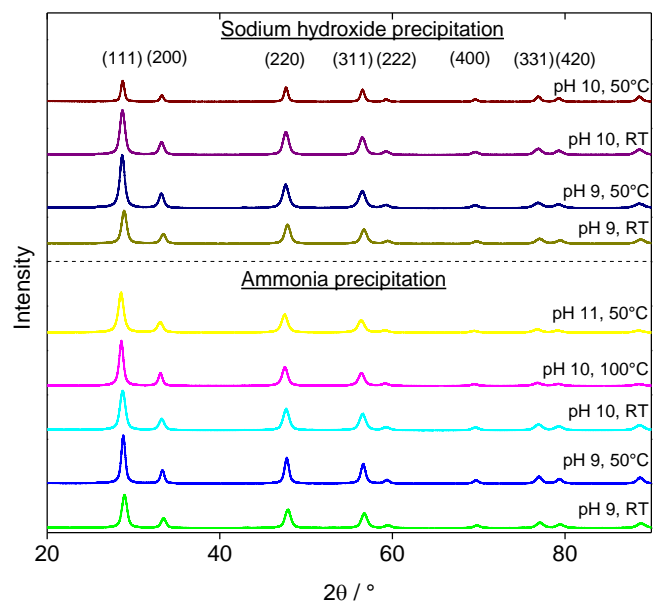

Fig. S7 XRD patterns of catalysts 4-6 and 8-13 all show phase pure  $\text{CeO}_2$ .

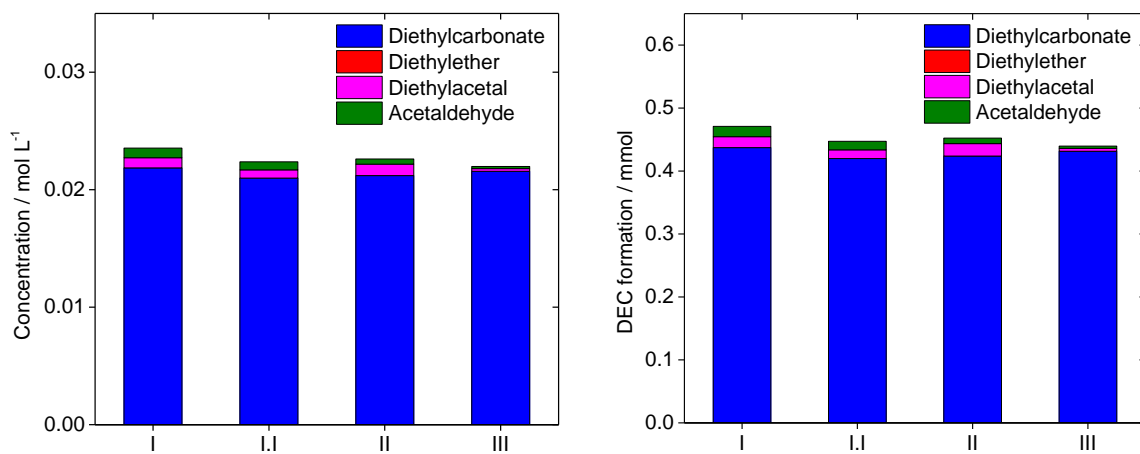

Fig. S8 Reproducibility of catalyst synthesis (I, II, III) and stability of catalytic testing (I, I.I). Catalyst synthesis conditions according to Urea precipitation method, Reaction conditions: 337 mmol ethanol, 0.2g catalyst, 120°C

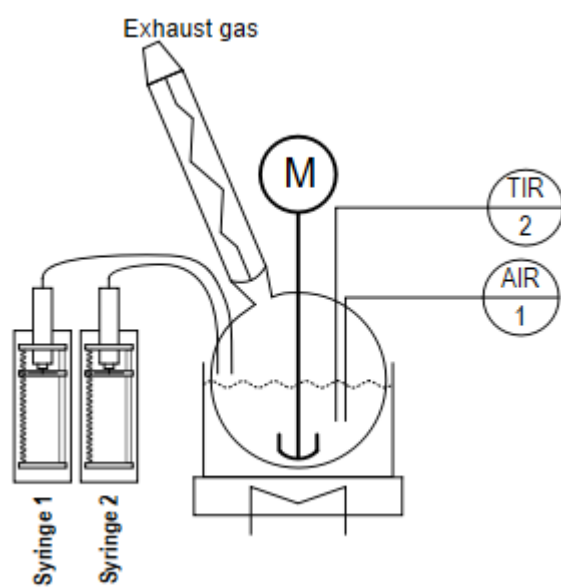

Fig. S9 Detailed scheme for the continuous catalyst preparation setup equipped with two syringe pumps, a pH-electrode, an stirred glass vessel with a mechanical stirrer and a condenser and an oil bath for heating. The precipitation conditions temperature and pH-value were controlled via an in-house lab software. The dosage

Figure S10: Corresponding graphs for Fig. 5-7 with the total amount of products in mmol:

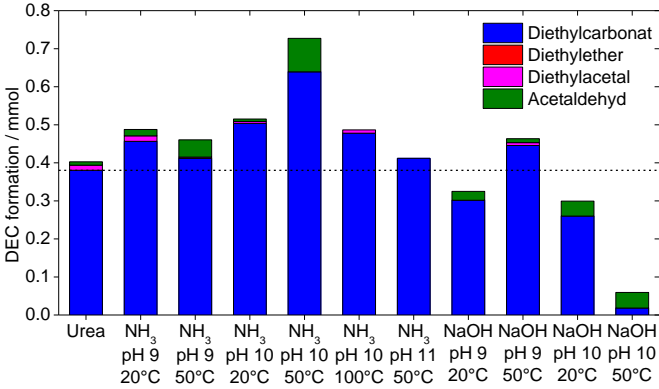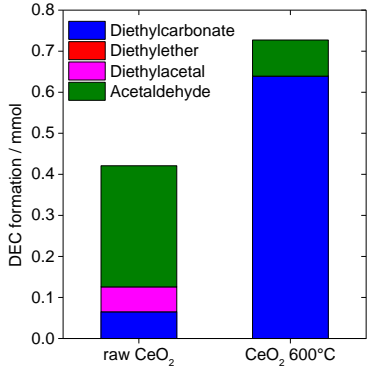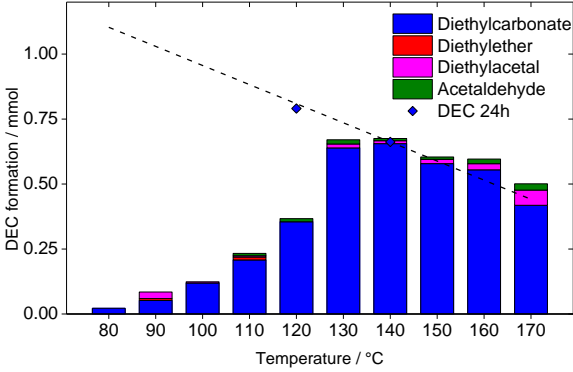

Supplement: d0cy01793k1.pdf [file d0cy01793k1.pdf]
